# Supplementary material
Source: PubMed Central journal article supplement (PMC6086986)
Supplement: BPH-175-3486-s001.pdf [file BPH-175-3486-s001.pdf]

# Glycyrrhizin has a high likelihood to be a victim of drug-drug interactions mediated by hepatic organic anion-transporting polypeptide 1B1/1B3

Jiajia Dong, Olajide E Olaleye, Rongrong Jiang, Jing Li, Chuang Lu, Feifei Du, Fang Xu, Junling Yang, Fengqing Wang, Weiwei Jia and Chuan Li

*British Journal of Pharmacology* (DOI:10.1111/bph.14393)

## - Supporting Information Appendix S1 -

**Table S1**

Inputs used in GastroPlus-based physiologically based pharmacokinetic (PBPK) modeling for i.v. glycyrrhizin

| Item                                                                                | Input                                           |                               |                                                 |                                    |
|-------------------------------------------------------------------------------------|-------------------------------------------------|-------------------------------|-------------------------------------------------|------------------------------------|
|                                                                                     | Rat                                             | Source                        | Human                                           | Source                             |
| Compound: glycyrrhizin                                                              |                                                 |                               |                                                 |                                    |
| Molecular formula                                                                   | C <sub>42</sub> H <sub>62</sub> O <sub>16</sub> | Filonova <i>et al.</i> , 2015 | C <sub>42</sub> H <sub>62</sub> O <sub>16</sub> | Filonova <i>et al.</i> , 2015      |
| MW (g·mol <sup>-1</sup> )                                                           | 823                                             | Filonova <i>et al.</i> , 2015 | 823                                             | Filonova <i>et al.</i> , 2015      |
| LogP                                                                                | 2.02                                            | Measured                      | 2.02                                            | Measured                           |
| pK <sub>a</sub> (acid)                                                              | 3.39, 5.55, 9.81                                | Measured                      | 3.39, 5.55, 9.81                                | Measured                           |
| Rat Oatp1b2, liver                                                                  |                                                 |                               |                                                 |                                    |
| Transporter location                                                                | Basolateral/influx                              |                               | —                                               |                                    |
| <i>In vitro</i> K <sub>m</sub> (μM)                                                 | 18.2                                            | Measured                      | —                                               | —                                  |
| <i>In vitro</i> V <sub>max</sub> (pmol·min <sup>-1</sup> ·mg <sup>-1</sup> protein) | 35.6                                            | Measured                      | —                                               | —                                  |
| <i>In vitro</i> fraction unbound (f <sub>u-incubation</sub> )                       | 1.0                                             | Measured                      | —                                               | —                                  |
| RAF                                                                                 | 15                                              | Fitted                        | —                                               | —                                  |
| Rat Mrp2, liver                                                                     |                                                 |                               |                                                 |                                    |
| Transporter location                                                                | Apical/efflux                                   |                               | —                                               |                                    |
| <i>In vitro</i> K <sub>m</sub> (μM)                                                 | 17.2                                            | Measured                      | —                                               | —                                  |
| <i>In vitro</i> V <sub>max</sub> (pmol·min <sup>-1</sup> ·mg <sup>-1</sup> protein) | 25.6                                            | Measured                      | —                                               | —                                  |
| <i>In vitro</i> fraction unbound (f <sub>u-incubation</sub> )                       | 1.0                                             | Measured                      | —                                               | —                                  |
| RAF                                                                                 | 3                                               | Fitted                        | —                                               | —                                  |
| Human OATP1B1, liver                                                                |                                                 |                               |                                                 |                                    |
| Transporter location                                                                | —                                               |                               | Basolateral/influx                              |                                    |
| <i>In vitro</i> K <sub>m</sub> (μM)                                                 | —                                               | —                             | 21.7                                            | Measured                           |
| <i>In vitro</i> V <sub>max</sub> (pmol·min <sup>-1</sup> ·mg <sup>-1</sup> protein) | —                                               | —                             | 16.6                                            | Measured                           |
| <i>In vitro</i> fraction unbound (f <sub>u-incubation</sub> )                       | —                                               | —                             | 1.0                                             | Measured                           |
| RAF                                                                                 | —                                               | —                             | 10                                              | Fitted                             |
| Human OATP1B3, liver                                                                |                                                 |                               |                                                 |                                    |
| Transporter location                                                                | —                                               |                               | Basolateral/influx                              |                                    |
| <i>In vitro</i> K <sub>m</sub> (μM)                                                 | —                                               | —                             | 18.4                                            | Measured                           |
| <i>In vitro</i> V <sub>max</sub> (pmol·min <sup>-1</sup> ·mg <sup>-1</sup> protein) | —                                               | —                             | 12.4                                            | Measured                           |
| <i>In vitro</i> fraction unbound (f <sub>u-incubation</sub> )                       | —                                               | —                             | 1.0                                             | Measured                           |
| RAF                                                                                 | —                                               | —                             | 10                                              | Fitted                             |
| Human MRP2, liver                                                                   |                                                 |                               |                                                 |                                    |
| Transporter location                                                                | —                                               |                               | Apical/efflux                                   |                                    |
| <i>In vitro</i> K <sub>m</sub> (μM)                                                 | —                                               | —                             | 12.3                                            | Measured                           |
| <i>In vitro</i> V <sub>max</sub> (pmol·min <sup>-1</sup> ·mg <sup>-1</sup> protein) | —                                               | —                             | 96.3                                            | Measured                           |
| <i>In vitro</i> fraction unbound (f <sub>u-incubation</sub> )                       | —                                               | —                             | 1.0                                             | Measured                           |
| RAF                                                                                 | —                                               | —                             | 1                                               | Fitted                             |
| Dosage form                                                                         | i.v. bolus                                      | From this investigation       | i.v. infusion                                   | Yamamura <i>et al.</i> , 1992      |
| Initial dose (mg)                                                                   | 0.66                                            | From this investigation       | 40, 80, 120                                     | Yamamura <i>et al.</i> , 1992      |
| Infusion time (h)                                                                   | —                                               | —                             | 0.2                                             | Yamamura <i>et al.</i> , 1992      |
| Pharmacokinetics                                                                    |                                                 |                               |                                                 |                                    |
| New PBPK: population estimates for age-related (PEAR)                               |                                                 |                               |                                                 |                                    |
| Species                                                                             | Rat                                             |                               | Human                                           |                                    |
| Population                                                                          | —                                               |                               | Japanese                                        |                                    |
| Gender                                                                              | —                                               |                               | Male                                            |                                    |
| Age (year)                                                                          | —                                               |                               | 30                                              |                                    |
| Weight (kg)                                                                         | 0.25                                            |                               | 50                                              |                                    |
| Edit PBPK:                                                                          |                                                 |                               |                                                 |                                    |
| SpecPStc (mL·s <sup>-1</sup> ·mL <sup>-1</sup> )                                    | Used, 2 × 10 <sup>-3</sup>                      | Fitted                        | Used, 2 × 10 <sup>-4</sup>                      | Fitted                             |
| Liver: K <sub>p</sub>                                                               | 0.47                                            | Measured                      | 0.47                                            | Same as rat liver K <sub>p</sub>   |
| Lung: K <sub>p</sub>                                                                | 0.22                                            | Measured                      | 0.22                                            | Same as rat lung K <sub>p</sub>    |
| Adipose: K <sub>p</sub>                                                             | 0.06                                            | Measured                      | 0.06                                            | Same as rat adipose K <sub>p</sub> |

|                                    |                                                                                    |                                     |                                                                                    |                                       |
|------------------------------------|------------------------------------------------------------------------------------|-------------------------------------|------------------------------------------------------------------------------------|---------------------------------------|
| Muscle: $K_p$                      | 0.06                                                                               | Measured                            | 0.06                                                                               | Same as rat muscle $K_p$              |
| Spleen: $K_p$                      | 0.08                                                                               | Measured                            | 0.08                                                                               | Same as rat spleen $K_p$              |
| Heart: $K_p$                       | 0.08                                                                               | Measured                            | 0.08                                                                               | Same as rat heart $K_p$               |
| Brain: $K_p$                       | 0.01                                                                               | Measured                            | 0.01                                                                               | Same as rat brain $K_p$               |
| Kidney: $K_p$                      | 0.17                                                                               | Measured                            | 0.17                                                                               | Same as rat kidney $K_p$              |
| Renal filtration estimate method   | $f_{U-plasma} \times GFR$                                                          |                                     | $f_{U-plasma} \times GFR$                                                          |                                       |
| Skin: $K_p$                        | 0.09                                                                               | Measured                            | 0.09                                                                               | Same as rat skin $K_p$                |
| Blood/plasma concentration ratio   | 0.49                                                                               | <a href="#">Ishida et al., 1990</a> | 0.54                                                                               | <a href="#">Yamamura et al., 1992</a> |
| Experimental plasma $f_{U-plasma}$ | Used, 0.008                                                                        | Measured                            | Used, 0.01                                                                         | <a href="#">Yu et al., 2012</a>       |
| <b>PBPK settings</b>               |                                                                                    |                                     |                                                                                    |                                       |
| $K_p$ prediction method            |                                                                                    |                                     |                                                                                    |                                       |
| Perfusion limited tissue           | —                                                                                  |                                     | —                                                                                  |                                       |
| Permeability limited tissue        | User defined (liver, lung, adipose, muscle, spleen, heart, brain, kidney and skin) |                                     | User defined (liver, lung, adipose, muscle, spleen, heart, brain, kidney and skin) |                                       |
| Simulation $f_{U-tissue}$          | Poulin equation                                                                    | Fitted                              | Poulin equation                                                                    | Fitted                                |
| Tissue albumin                     | Rothschild                                                                         | Fitted                              | Rothschild                                                                         | Fitted                                |
| <b>Simulation</b>                  |                                                                                    |                                     |                                                                                    |                                       |
| Simulation mode                    | Single simulation                                                                  |                                     | Single simulation                                                                  |                                       |
| Simulation length (h)              | 12                                                                                 |                                     | 12                                                                                 |                                       |

## References

Filonova OV, Lekar AV, Borisenko EV, Maksimenko EV, Vetrova EV, Borisenko *et al.* (2015). Synthesis of glycyrrhetic acid monoglycoside by hydrolysis of glycyrrhizin acid in subcritical water. *Russ J Phys Chem* 10: 1153–1156.

Ishida S, Sakiya Y, Ichikawa T, Taira Z, Awazu S (1990). Prediction of glycyrrhizin disposition in rat and man by a physiologically based pharmacokinetic model. *Chem Pharm Bull* 38: 212–218.

Yamamura Y, Kawakami J, Santa T, Kotaki H, Uchino K, Sawada Y *et al.* (1992). Pharmacokinetic profile of glycyrrhizin in healthy volunteers by a new high-performance liquid chromatographic method. *J Pharm Sci* 81: 1042–1046.

Yu K, Chen F, Li C (2012). Absorption, disposition, and pharmacokinetics of saponins from Chinese medicinal herbs: what do we know and what do we need to know more? *Curr Drug Metab* 13: 577–598.

**Table S2**

Input used in GastroPlus-based PBPK modeling for i.v. rifampin in rats

| Item                                                  | Input                                                                                       | Source                     |
|-------------------------------------------------------|---------------------------------------------------------------------------------------------|----------------------------|
| Compound: rifampin                                    |                                                                                             |                            |
| Molecular formula                                     | C <sub>43</sub> H <sub>58</sub> N <sub>4</sub> O <sub>12</sub>                              | Maggi <i>et al.</i> , 1966 |
| MW (g·mol <sup>-1</sup> )                             | 823                                                                                         | Maggi <i>et al.</i> , 1966 |
| LogP                                                  | 2.19                                                                                        | Measured                   |
| pK <sub>a</sub> (acid)                                | 2.27                                                                                        | Measured                   |
| pK <sub>a</sub> (base)                                | 7.89                                                                                        | Measured                   |
| Dosage form                                           | I.v. bolus                                                                                  | Jiang <i>et al.</i> , 2015 |
| Initial dose (mg)                                     | 2.5, 5                                                                                      | Jiang <i>et al.</i> , 2015 |
| Pharmacokinetics                                      |                                                                                             |                            |
| New PBPK: population estimates for age-related (PEAR) |                                                                                             |                            |
| Species                                               | Rat                                                                                         | —                          |
| Weight (kg)                                           | 0.25                                                                                        | —                          |
| Edit PBPK:                                            |                                                                                             |                            |
| SpecPStc (mL·s <sup>-1</sup> ·mL <sup>-1</sup> )      | Used, 2.5 × 10 <sup>-2</sup>                                                                | Fitted                     |
| Liver: CL <sub>int</sub> (L·h <sup>-1</sup> )         | 0.020                                                                                       | Jiang <i>et al.</i> , 2015 |
| Kidney: renal filtration estimate method              | f <sub>u-plasma</sub> × GFR                                                                 | —                          |
| Blood/plasma concentration ratio                      | 0.90                                                                                        | Loos <i>et al.</i> , 1985  |
| Experimental plasma f <sub>u-plasma</sub>             | 0.231                                                                                       | Jiang <i>et al.</i> , 2015 |
| Adjusted plasma f <sub>u-plasma</sub>                 | Used                                                                                        | —                          |
| PBPK settings                                         |                                                                                             |                            |
| K <sub>p</sub> prediction method                      |                                                                                             |                            |
| Perfusion limited tissue                              | Poulin & Theil - Homogeneous (lung, adipose, muscle, spleen, heart, brain, kidney and skin) | Fitted                     |
| Permeability limited tissue                           | Poulin & Theil - Extracellular (liver)                                                      | Fitted                     |
| Simulation f <sub>u-tissue</sub>                      | S+ equation                                                                                 | Fitted                     |
| Tissue albumin                                        | Rothschild                                                                                  | Fitted                     |
| Simulation                                            |                                                                                             |                            |
| Simulation mode                                       | Single simulation                                                                           |                            |
| Simulation length (h)                                 | 8                                                                                           |                            |

## References

Jiang R-R, Dong J-J, Li X-X, Du F-F, Jia W-W, Xu F *et al.* (2015). Molecular mechanisms governing different pharmacokinetics of ginsenosides and potential for ginsenoside-perpetrated herb-drug interactions on OATP1B3. *Br J Pharmacol* 172: 1059–1073.

Loos U, Musch E, Jensen JC, Mikus G, Schwabe HK, Eichelbaum M (1985). Pharmacokinetics of oral and intravenous rifampicin during chronic administration. *Klin Wochenschr* 63:1205–1211.

Maggi N, Pasqualucci CR, Ballotta R, Sensi P (1966). Rifampicin: a new orally active rifamycin. *Chemotherapia* 11: 285–292.

**Table S3**

Observed and PBPK model-predicted plasma pharmacokinetics of rifampin in rats after an i.v. bolus dose at 10 and 20 mg·kg<sup>-1</sup>. The observed values were calculated from the rat plasma concentrations of rifampin over time reported by this laboratory (Jiang *et al.*, 2015). The PBPK model for i.v. rifampin was developed in this investigation (Table S2 in Supporting Information Appendix S1).

| Pharmacokinetic parameter                                                                       | Observed    | Predicted (Accuracy) |
|-------------------------------------------------------------------------------------------------|-------------|----------------------|
| Pharmacokinetics of rifampin in rats that received an i.v. bolus dose at 10 mg·kg <sup>-1</sup> |             |                      |
| C <sub>5min</sub> (μM)                                                                          | 18.3 ± 0.9  | 17.9 (98.0%)         |
| AUC <sub>0-8h</sub> (μM·h)                                                                      | 48.2 ± 4.0  | 49.0 (102%)          |
| t <sub>1/2</sub> (h)                                                                            | 2.58 ± 0.35 | 3.13 (121%)          |
| CL <sub>tot,p</sub> (mL·h <sup>-1</sup> ·kg <sup>-1</sup> )                                     | 253 ± 20    | 248 (98.1%)          |
| V <sub>SS</sub> (mL·kg <sup>-1</sup> )                                                          | 848 ± 18    | 904 (107%)           |
| Pharmacokinetics of rifampin in rats that received an i.v. bolus dose at 20 mg·kg <sup>-1</sup> |             |                      |
| C <sub>5min</sub> (μM)                                                                          | 41.3 ± 4.7  | 35.9 (86.9%)         |
| AUC <sub>0-8h</sub> (μM·h)                                                                      | 117 ± 16    | 98.0 (83.6%)         |
| t <sub>1/2</sub> (h)                                                                            | 2.72 ± 0.32 | 3.12 (115%)          |
| CL <sub>tot,p</sub> (mL·h <sup>-1</sup> ·kg <sup>-1</sup> )                                     | 256 ± 38    | 248 (96.8%)          |
| V <sub>SS</sub> (mL·kg <sup>-1</sup> )                                                          | 895 ± 121   | 903 (101%)           |

## References

Jiang R-R, Dong J-J, Li X-X, Du F-F, Jia W-W, Xu F *et al.* (2015). Molecular mechanisms governing different pharmacokinetics of ginsenosides and potential for ginsenoside-perpetrated herb-drug interactions on OATP1B3. *Br J Pharmacol* 172: 1059–1073.

**Table S4**Tissue distribution of glycyrrhizin in rifampin-untreated rats after an i.v. bolus dose at 2.6 mg·kg<sup>-1</sup>

| Tissue  | C <sub>5 min</sub> (μM) | AUC <sub>0-4 h</sub> (μM·h) | K <sub>p</sub> |
|---------|-------------------------|-----------------------------|----------------|
| Plasma  | 14.7 ± 4.1              | 15.7 ± 3.0                  | —              |
| Kidney  | 2.12 ± 0.28             | 2.71 ± 0.47                 | 0.17 ± 0.04    |
| Liver   | 10.8 ± 1.5              | 7.46 ± 0.95                 | 0.47 ± 0.12    |
| Heart   | 1.10 ± 0.08             | 1.28 ± 0.27                 | 0.08 ± 0.02    |
| Lung    | 2.26 ± 0.62             | 3.46 ± 0.79                 | 0.22 ± 0.06    |
| Spleen  | 1.15 ± 0.20             | 1.23 ± 0.03                 | 0.08 ± 0.01    |
| Brain   | 0.23 ± 0.06             | 0.18 ± 0.02                 | 0.01 ± 0.00    |
| Adipose | 0.47 ± 0.05             | 0.86 ± 0.20                 | 0.06 ± 0.06    |
| Muscle  | 0.54 ± 0.09             | 0.88 ± 0.17                 | 0.06 ± 0.01    |
| Skin    | 0.78 ± 0.05             | 1.30 ± 0.24                 | 0.09 ± 0.02    |

C<sub>5 min</sub>, concentration at 5 min after dosing; AUC, area under concentration-time curve; K<sub>p</sub>, tissue/plasma partition coefficient. The data for tissue distribution of glycyrrhizin represent means ± SDs (n = 5).

**Table S5**

Predicted increase of glycyrrhizin's area under concentration-time curve (AUC) in presence of inhibitors of OATP1B1/1B3

| Inhibitor                               | $K_i$ or $IC_{50}$ ( $\mu M$ ) |                  | Dose (mg) | $C_{max}$ ( $\mu M$ ) | $t_{1/2}$ (h) | $K_a$ (min) | $f_{u-plasma}$ | $R$ | $R_{AUC}$ | Note                                                                                                                                        |
|-----------------------------------------|--------------------------------|------------------|-----------|-----------------------|---------------|-------------|----------------|-----|-----------|---------------------------------------------------------------------------------------------------------------------------------------------|
|                                         | OATP1B1                        | OATP1B3          |           |                       |               |             |                |     |           |                                                                                                                                             |
| Paritaprevir (oral; qd)                 | $IC_{50}$ , 0.03               | $IC_{50}$ , 0.02 | 150       | 1.9                   | 2.7           | 0.004       | 0.02           | 1.0 | 2.6       | Antiviral agent; (Menon <i>et al.</i> , 2016; Shebley <i>et al.</i> , 2017)                                                                 |
| Telaprevir (oral; tid)                  | $IC_{50}$ , 1.4                | $IC_{50}$ , 9.7  | 750       | 5.5                   | 4.7           | 0.1         | 0.37           | 1.4 | 4.1       | Antiviral agent; (Furihata <i>et al.</i> , 2004)                                                                                            |
| Simeprevir (oral; qd)                   | $IC_{50}$ , 0.3                | $IC_{50}$ , 0.2  | 150       | 5.9                   | 11.5          | 0.1         | 0.01           | 1.3 | 1.7       | Antiviral agent; (Furihata <i>et al.</i> , 2004; Sanford, 2015)                                                                             |
| Sofosbuvir (oral; qd)                   | $IC_{50}$ , 16.5               | $IC_{50}$ , 61.9 | 400       | 1.1                   | 0.5           | 0.1         | 0.37           | 1.0 | 1.3       | Antiviral agent; (Furihata <i>et al.</i> , 2004; Lawitz <i>et al.</i> , 2013)                                                               |
| Ritonavir (oral; bid)                   | $IC_{50}$ , 0.5                | $IC_{50}$ , 0.6  | 600       | 15.5                  | 3.2           | 0.003       | 0.01           | 1.1 | 1.3       | Antiviral agent; (Danner <i>et al.</i> , 1995; Shebley <i>et al.</i> , 2017)                                                                |
| Atazanavir (oral; qd)                   | $IC_{50}$ , 1.4                | $IC_{50}$ , 0.4  | 300       | 0.9                   | 6.5           | 0.1         | 0.04           | 1.1 | 1.8       | Antiviral agent; (Karlgrén <i>et al.</i> , 2012; Metsu <i>et al.</i> , 2017)                                                                |
| Indinavir (oral; tid)                   | $K_i$ , 10.8                   | $K_i$ , 8.5      | 800       | 11.4                  | 1.05          | 0.1         | 0.4            | 1.0 | 4.6       | Antiviral agent; (Acosta <i>et al.</i> , 1999; Anderson <i>et al.</i> ; 2000; Annaert <i>et al.</i> , 2010)                                 |
| Rifampin (oral; qd)                     | $K_i$ , 0.2                    | $K_i$ , 0.3      | 450       | 10.4                  | 3.6           | 0.1         | 0.20           | 1.0 | 28.7      | Antibacterial agent; (Pargal <i>et al.</i> , 2001; Karlgrén <i>et al.</i> , 2012)                                                           |
| Erythromycin ethylsuccinate (oral; tid) | $IC_{50}$ , 7.5                | $IC_{50}$ , 1.6  | 600       | 1.7                   | 2.7           | 0.07        | 0.20           | 1.2 | 4.9       | Antibacterial agent; (Croteau <i>et al.</i> , 1988; De Bruyn <i>et al.</i> , 2013)                                                          |
| Dicloxacillin (oral; qid)               | $K_i$ , 0.4                    | $K_i$ , 1.6      | 250       | 29.0                  | 1.4           | 0.1         | 0.04           | 1.1 | 2.5       | Antibacterial agent; (Roder <i>et al.</i> , 1995; De Bruyn <i>et al.</i> , 2013; Wu <i>et al.</i> , 2015)                                   |
| Silibinin (oral; qd)                    | $K_i$ , 3.4                    | $K_i$ , 3.3      | 240       | 1.3                   | 6.0           | 0.1         | 0.25           | 1.1 | 3.6       | Adjuvant in chronic hepatitis and cirrhosis; (Lorenz <i>et al.</i> , 1984; Weyhenmeyer <i>et al.</i> , 1992; De Bruyn <i>et al.</i> , 2013) |

$C_{max}$ , maximum plasma concentration of inhibitor after oral dosing in humans; dose, inhibitor dose;  $f_{u-plasma}$ , unbound fraction of inhibitor in plasma;  $K_i$ , inhibition constant;  $IC_{50}$ , half maximal inhibitory concentration of inhibitor;  $K_a$ , absorption rate constant of inhibitor;  $R$ , accumulative factor for inhibitor;  $t_{1/2}$ , terminal half-life of inhibitor;  $R_{AUC}$ , ratio of glycyrrhizin's AUC in presence and absence of an inhibitor of OATP1B1/1B3.  $R_{AUC}$  was calculated using the following equation (Tweedie *et al.*, 2013):

$$R_{AUC} = 1 + I_{in,max,u}/K_i \text{ or } R_{AUC} = 1 + I_{in,max,u}/IC_{50} \quad (1)$$

where  $I_{in,max,u}$  is the estimated maximum unbound concentration of the inhibitor at the inlet to the liver and is equal to  $f_{u-plasma} \cdot [C_{max} \times R + (F_a F_g \times K_a \times \text{Dose})/Q_h]$ .  $R$  is equal to  $1/(1 - e^{-kt})$ , where  $k$  is the elimination rate constant ( $0.693/t_{1/2}$ ) and  $t$  is the dosing interval (h).  $F_a F_g$  is the inhibitor's fraction of dose absorbed and was set at 1.  $Q_h$  is the human hepatic blood flow (estimated as  $1500 \text{ mL} \cdot \text{min}^{-1}$ ). If  $K_a$  value is unknown,  $K_a$  was set at  $0.1 \text{ min}^{-1}$ . For  $I_{in,max,u}$  estimation, blood-to-plasma concentration ratios of the inhibitors were assumed to be 1. Glycyrrhizin is a dual substrate of OATP1B1 and OATP1B3, which exhibit comparable transport capabilities based on the *in vitro* data in Table 2. Because OATP1B1 and OATP1B3 normally can compensate for the lack of each other,  $R_{AUC}$  is calculated using the higher of the  $K_i$  (or  $IC_{50}$ ) values for these two transporters; genetic polymorphisms, which may result in poor hepatic expression or negligible transport activity of either of these transporters, are not considered here.

## References

- Acosta EP, Henry K, Baken L, Page LM, Fletcher CV (1999). Indinavir concentrations and antiviral effect. *Pharmacotherapy* 19(6): 708–712.
- Anderson PL, Brundage RC, Bushman L, Kakuda TN, Remmel RP, Fletcher CV (2000). Indinavir plasma protein binding in HIV-1-infected adults. *AIDS* 14(15): 2293–2297.
- Annaert P, Ye ZW, Stieger B, Augustijns P (2010). Interaction of HIV protease inhibitors with OATP1B1, 1B3, and 2B1. *Xenobiotica* 40(3): 163–176.
- Croteau D, Bergeron MG, LeBel M (1988). Pharmacokinetic advantages of erythromycin estolate over ethylsuccinate as determined by high-pressure liquid chromatography. *Antimicrob Agents Chemother* 32(4): 561–565.

- Danner SA, Carr A, Leonard JM, Lehman LM, Gudiol F, Gonzales J *et al.* (1995). A short-term study of the safety, pharmacokinetics, and efficacy of ritonavir, an inhibitor of HIV-1 protease. *N Engl J Med* 333(23): 1528–1533.
- De Bruyn T, van Westen GJ, Ijzerman AP, Stieger B, de Witte P, Augustijns PF *et al.* (2013). Structure-Based Identification of OATP1B1/3 Inhibitors. *Mol Pharmacol* 83:1257–1267.
- Furihata T, Matsumoto S, Fu Z-G, Tsubota A, Sun Y, Matsumoto S *et al.* (2004). Different Interaction Profiles of Direct-Acting Anti-Hepatitis C Virus Agents with Human Organic Anion Transporting Polypeptides. *Am J Gastroenterol Antimicrob Agents Ch* 58: 4555–4564.
- Karlgren M, Vildhede A, Norinder U, Wisniewski JR, Kimoto E *et al.* (2012). Classification of Inhibitors of Hepatic Organic Anion Transporting Polypeptides (OATPs): Influence of Protein Expression on Drug-Drug Interactions. *J Med Chem* 55: 4740–4763.
- Lawitz EJ, Rodriguez-Torres M, Denning J, Mathias A, Mo H, Gao B *et al.* (2013). All-oral therapy with nucleotide inhibitors sofosbuvir and GS-0938 for 14 days in treatment-naive genotype 1 hepatitis C (NUCLEAR). *J Viral Hepat* 20(10):699–707.
- Lorenz D, Lückner PW, Mennicke WH, Wetzelsberger N (1984). Pharmacokinetic studies with silymarin in human serum and bile. *Methods Find Exp Clin Pharmacol* 6(10):655–661.
- Menon RM, Klein CE, Podsadecki TJ, Chiu YL, Dutta S, Awni WM (2016). Pharmacokinetics and tolerability of paritaprevir, a direct acting antiviral agent for hepatitis C virus treatment, with and without ritonavir in healthy volunteers. *Br J Clin Pharmacol* 81(5):929–940.
- Metsu D, Seraissol P, Delobel P, Cinq-Frais C, Cuzin L, Izopet J *et al.* (2017). Is the unbound concentration of atazanavir of interest in therapeutic drug monitoring? *Fund Clin Pharmacol* 31: 245–253.
- Pargal A, Rani S (2001). Non-linear pharmacokinetics of rifampicin in healthy Asian Indian volunteers. *Int J Tuberc Lung Dis* 5(1):70–79.
- Roder BL, Frimodt-Moller N, Espersen E, Rasmussen SN (1995). Dicloxacillin and flucloxacillin: Pharmacokinetics, protein binding and serum bactericidal titers in healthy subjects after oral administration. *Infection* 23(2): 107–112.
- Sanford M (2015). Simeprevir: a review of its use in patients with chronic hepatitis C virus infection. *Drugs* 75(2):183–196.
- Shebley M, Liu J-R, Kavetskaia O, Sydor J, de Moraes SM *et al.* (2017). Mechanisms and Predictions of Drug-Drug Interactions of the Hepatitis C Virus Three Direct-Acting Antiviral Regimen: Paritaprevir/Ritonavir, Ombitasvir, and Dasabuvir. *Drug Metab Dispos* 45: 755–764.
- Tweedie D, Polli JW, Berglund EG, Huang SM, Zhang L, Poirier A, *et al.* (2013). Transporter studies in drug development: experience to date and follow-up on decision trees from the international transporter consortium. *Clin Pharmacol Ther* 94: 113–125.
- Weyhenmeyer R, Mascher H, Birkmayer J (1992). Study on dose-linearity of the pharmacokinetics of silibinin diastereomers using a new stereospecific assay. *Int J Clin Pharmacol Ther Toxicol* 30(4):134–138.
- Wu G, Zheng Y, Zhou H, Hu X, Liu J, Zhai Y *et al.* (2015). Safety and pharmacokinetics of dicloxacillin in healthy Chinese volunteers following single and multiple oral doses. *Drug Design Dev Ther* 9: 5687–5695.
