# Supplementary material
Source: PubMed Central journal article supplement (PMC6086986)
Supplement: BPH-175-3486-s002.pdf [file BPH-175-3486-s002.pdf]

# Glycyrrhizin has a high likelihood to be a victim of drug-drug interactions mediated by hepatic organic anion-transporting polypeptide 1B1/1B3

Jiajia Dong, Olajide E Olaleye, Rongrong Jiang, Jing Li, Chuang Lu, Feifei Du, Fang Xu, Junling Yang, Fengqing Wang, Weiwei Jia and Chuan Li

*British Journal of Pharmacology* (DOI:10.1111/bph.14393)

## - Supporting Information Appendix S2 -

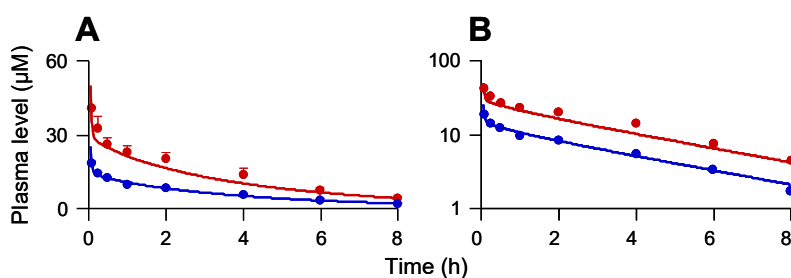

### Figure S1

Observed (dots) and retrospectively predicted plasma concentrations (lines) of rifampin over time after an i.v. bolus dose of rifampin at 10 (in blue) and 20 (in red)  $\text{mg}\cdot\text{kg}^{-1}$  in rats. The observed concentrations of rifampin (solid circles), representing means and standard deviations, are obtained from the rat data reported by [Jiang \*et al.\* \(2015\)](#). The PBPK model for i.v. rifampin was developed in this investigation ([Table S2](#) in [Supporting Information Appendix S1](#)). Panels A and B are arithmetic and semilogarithmic plots, respectively.

### Reference

Jiang R-R, Dong J-J, Li X-X, Du F-F, Jia W-W, Xu F *et al.* (2015). Molecular mechanisms governing different pharmacokinetics of ginsenosides and potential for ginsenoside-perpetrated herb-drug interactions on OATP1B3. *Br J Pharmacol* 172: 1059–1073.

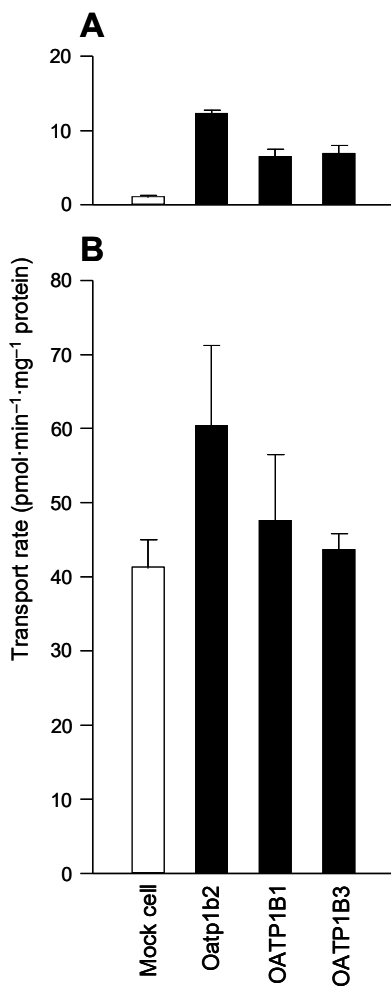

**Figure S2**

Transport of glycyrrhizin (A) and rifampin (B) in HEK-293 mock cells and rat Oatp1b2-, human OATP1B1- and human OATP1B3-expressing HEK-293 cells. The transport values represent the means  $\pm$  SDs ( $n = 3$ ).

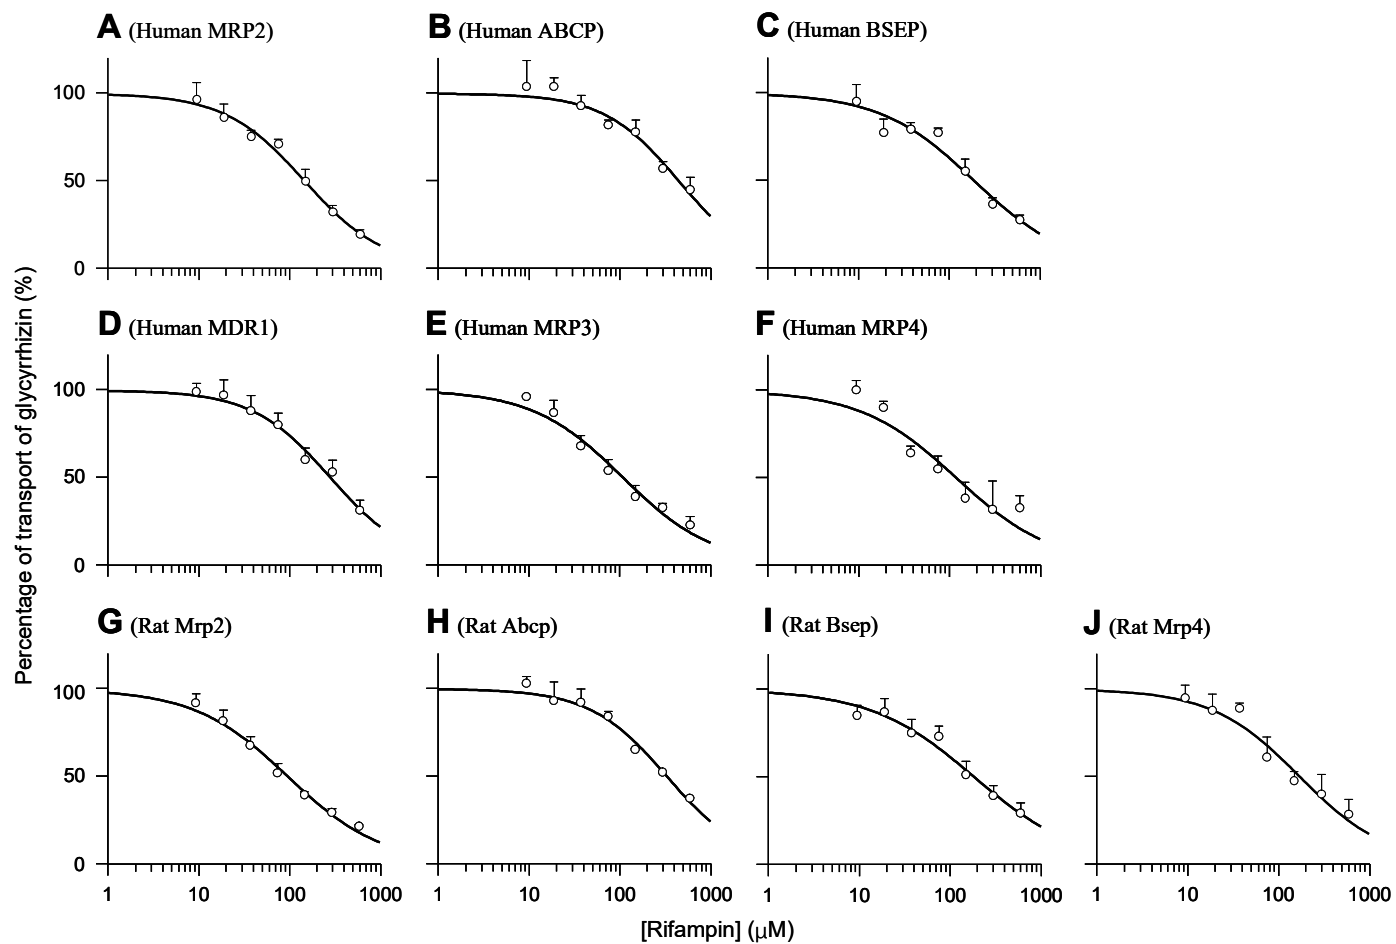

**Figure S3**

Representative  $IC_{50}$  plots of rifampin inhibition of human MRP2- (A), human ABCP- (B), human BSEP- (C), human MDR1- (D), human MRP3- (E), human MRP4- (F), rat Mrp2- (G), rat Abcp- (H), rat Bsep- (I) and rat Mrp4-mediated vesicular transport of glycyrrhizin (J). The  $IC_{50}$  values are shown in [Table 2](#), and they represent the means  $\pm$  SDs ( $n = 3$ ). The concentration of the substrate glycyrrhizin was 50  $\mu$ M for all the test transporters. The concentrations of the inhibitor rifampin were 0–600  $\mu$ M for all the test transporters.

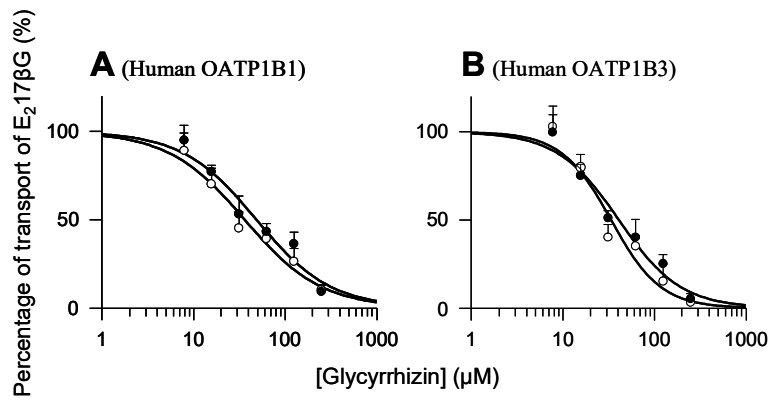

**Figure S4**

IC<sub>50</sub> plots of glycyrrhizin inhibition of human OATP1B1- (A) and human OATP1B3-mediated cellular uptake of E<sub>2</sub>17βG (B) after 1-h preincubation with glycyrrhizin in the absence of the substrate E<sub>2</sub>17βG (solid dots) and after such preincubation without glycyrrhizin (open dots). The IC<sub>50</sub> values represent the means ± SDs (*n* = 3). The concentrations of glycyrrhizin were 0–250 μM and the concentration of E<sub>2</sub>17βG was 10 μM.

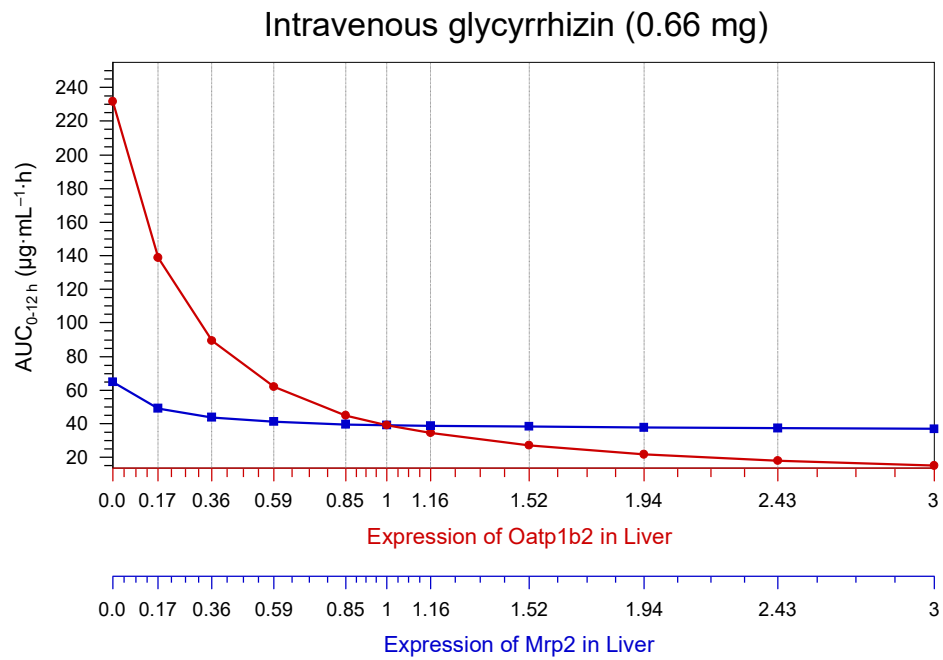

**Figure S5**

Parameter sensitivity analysis (PSA) plot for relationship of expression of Oatp1b2 and Mrp2 in the rat liver to plasma AUC<sub>0-12 h</sub> of glycyrrhizin.
